# Supplementary material
Source: MDPI journal article supplement (https://www.mdpi.com/2072-4292/12/22/3780)

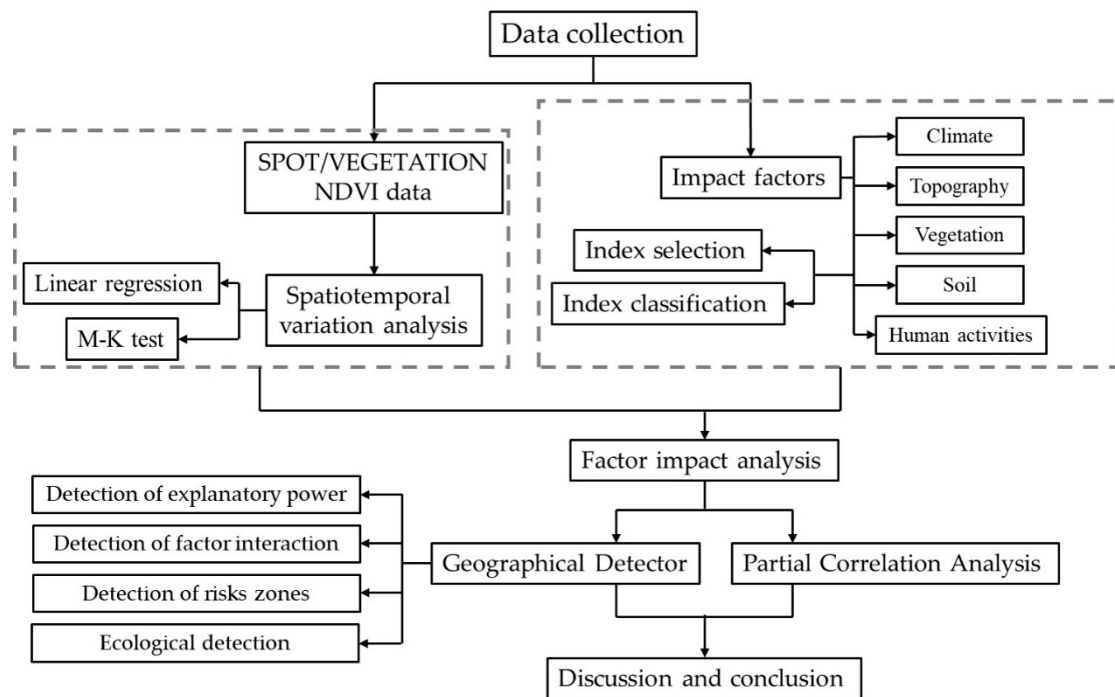

**Figure S1.** Flow chart of the methodology implemented in the study.

Supplement: s1 [file s1]
